# Supplementary material
Source: PubMed Central journal article supplement (PMC7153779)
Supplement: ol0c00219_si_001.pdf [file ol0c00219_si_001.pdf]

## Supporting Information

### **Wheldone: Characterization of a unique scaffold from the co-culture of *Aspergillus fischeri* and *Xylaria flabelliformis***

Sonja L. Knowles, Huzefa A. Raja, Israa H. Isawi, Laura Flores-Bocanegra, Patricia H. Reggio, Cedric J. Pearce, Joanna E. Burdette, Antonis Rokas, and Nicholas H. Oberlies\*

Corresponding Author

**Nicholas H. Oberlies** - *Department of Chemistry and Biochemistry, University of North Carolina at Greensboro, Greensboro, North Carolina 27402, United States*

E-mail: [nicholas\\_oberlies@uncg.edu](mailto:nicholas_oberlies@uncg.edu);

<https://chem.uncg.edu/oberlies/>

Authors

**Sonja L. Knowles** - *Department of Chemistry and Biochemistry, University of North Carolina at Greensboro, Greensboro, North Carolina 27402, United States*

**Huzefa A. Raja** - *Department of Chemistry and Biochemistry, University of North Carolina at Greensboro, Greensboro, North Carolina 27402, United States*

**Israa H. Isawi** - *Department of Chemistry and Biochemistry, University of North Carolina at Greensboro, Greensboro, North Carolina 27402, United States*

**Laura Flores-Bocanegra** - *Department of Chemistry and Biochemistry, University of North Carolina at Greensboro, Greensboro, North Carolina 27402, United States*

**Patricia H. Reggio** - *Department of Chemistry and Biochemistry, University of North Carolina at Greensboro, Greensboro, North Carolina 27402, United States*

**Cedric J. Pearce** – *Mycosynthetix, Inc., Hillsborough, North Carolina 27278, United States*

**Joanna E. Burdette** - *Department of Pharmaceutical Sciences, University of Illinois at Chicago, Chicago, Illinois 60612, United States*

**Antonis Rokas** - *Department of Biological Sciences, Vanderbilt University, Nashville, TN, 37235, United States*

## EXPERIMENTAL SECTION

### General Experimental Section

### Fungal Strain Isolation and Identification

### Fermentation, Extraction, and Isolation

### Preparation of the (R)- and (S)-MTPA Ester Derivatives of wheldone

### Cytotoxicity Assay

**Figure S1.** LC-MS chromatogram, (+)-HRESIMS spectrum, and purity of compound **1**.

**Figure S2.**  $^1\text{H}$  (700 MHz) and  $^{13}\text{C}$  (175 MHz) NMR data for wheldone (**1**) in  $\text{CD}_3\text{OD}$ .

**Figure S3.** HSQC NMR spectrum of compound **1** (700 MHz,  $\text{CD}_3\text{OD}$ ).

**Figure S4.** COSY NMR spectrum of compound **1** (700 MHz,  $\text{CD}_3\text{OD}$ ).

**Figure S5.** HMBC NMR spectrum of compound **1** (700 MHz,  $\text{CD}_3\text{OD}$ ).

**Figure S6.** NOESY NMR spectrum of compound **1** (400 MHz,  $\text{CD}_3\text{OD}$ ).

**Figure S7.** Key NOESY correlations for compound **1**.

**Figure S8.** A larger version of **Figure 2** Panel A.

**Figure S9.** Data confirming the biosynthesis of **1** from a co-culture of *X. flabelliformis* vs. fungal strain MSX79272.

## EXPERIMENTAL SECTION

**General Experimental Procedures.** Optical rotation data were obtained using a Rudolph Research Autopol III polarimeter, and UV spectra were measured with a Varian Cary 100 Bio UV–vis spectrophotometer. The NMR data were collected using an Agilent 700 MHz spectrometer (Agilent Technologies), equipped with a cryoprobe, operating at 700 MHz for  $^1\text{H}$  and 175 MHz for  $^{13}\text{C}$ . HRMS experiments utilized either a Thermo LTQ Orbitrap XL mass spectrometer or a Thermo Q Exactive Plus (Thermo Fisher Scientific); both were equipped with an electrospray ionization source. A Waters Acquity UPLC (Waters Corp.) was utilized for both mass spectrometers, using a BEH  $\text{C}_{18}$  column (1.7  $\mu\text{m}$ ; 50 mm x 2.1 mm) set to a temperature of 40°C and a flow rate of 0.3 mL/min. The mobile phase consisted of a linear gradient of  $\text{CH}_3\text{CN}$ - $\text{H}_2\text{O}$  (both acidified with 0.1% formic acid), starting at 15%  $\text{CH}_3\text{CN}$  and increasing linearly to 100%  $\text{CH}_3\text{CN}$  over 8 min, with a 1.5 min hold before returning to the starting condition. The HPLC separations were performed with Atlantis T3  $\text{C}_{18}$  preparative (5  $\mu\text{m}$ ; 19 x 250 mm) column, with a Varian Prostar HPLC system equipped with a Prostar 210 pumps and a Prostar 335 photodiode array detector (PDA), with the collection and analysis of data using Galaxie Chromatography Workstation software. Flash chromatography was performed on a Teledyne ISCO Combiflash Rf 200 and monitored by both ELSD and PDA detectors.

**Fungal Strain Isolation and Identification.** *Aspergillus fischeri* strain NRRL 181 was obtained from ARS Culture Collection (NRRL).<sup>1</sup> *Xylaria flabelliformis* (formally *Xylaria cubensis*) strain G536 was isolated as an endophyte from surface sterilized twigs of *Asimina triloba* and identified using molecular methods as outlined previously.<sup>2</sup> The genome for *X. flabelliformis* was reported recently.<sup>3</sup>

**Fermentation, Extraction, and Isolation.** Storage, fermentation, and extraction conditions were reported previously.<sup>4</sup> Briefly, *A. fischeri* and *X. flabelliformis* were grown separately in 10 mL of YESD broth (2% soy peptone, 2% dextrose, and 1% yeast extract; 5 g of yeast extract, 10 g of soy peptone, and 10 g of D-glucose in 500 mL of deionized  $\text{H}_2\text{O}$ ) and cultivated at 22°C with agitation at 100 rpm for 3 (*A. fischeri*) and 5 days (*X. flabelliformis*). YESD seed cultures of both fungi grown individually were subsequently used to inoculate 16, 250 mL Erlenmeyer flasks that contained 10 g of autoclaved Quaker Breakfast Oatmeal each (10 g of oatmeal with 17 mL of deionized  $\text{H}_2\text{O}$  and sterilized for 15–20 mins at 121°C). Following incubation at room temperature for 3 weeks, each solid culture was extracted by adding 60 mL of 1:1  $\text{MeOH}$ - $\text{CHCl}_3$ . Subsequently, each culture was chopped with a spatula and left to shake overnight (~16 hrs) at ~100 rpm at room temperature. The cultures (16 flasks) were combined and filtered *in vacuo*, and 1500 mL  $\text{CHCl}_3$  and 2400 mL  $\text{H}_2\text{O}$  were added to the filtrate. The mixture was stirred for 30 min and then transferred to a separatory funnel. The organic layer ( $\text{CHCl}_3$ ) was drawn off and evaporated to dryness *in vacuo*. The dried organic layer was reconstituted in 300 mL of (1:1)  $\text{MeOH}$ - $\text{CH}_3\text{CN}$  and 300 mL of hexanes, transferred to a separatory funnel, and shaken vigorously. The defatted organic layer ( $\text{MeOH}$ - $\text{CH}_3\text{CN}$ ) was evaporated to dryness *in vacuo*. The organic layer (1.28 g) was dissolved in  $\text{CHCl}_3$ , absorbed onto Celite 545 (Acros Organics), and fractionated by normal phase flash chromatography using a gradient of hexane- $\text{CHCl}_3$ - $\text{MeOH}$  at a 30 mL/min flow rate and 61.0 column volumes, which yielded six fractions. Fraction two (239.22 mg) was further purified via preparative HPLC using a gradient system 50:50 to 90:10 of  $\text{CH}_3\text{CN}$ - $\text{H}_2\text{O}$  with 0.1% formic acid over 30 min at a flow rate of 16.9 mL/min to yield 14 subfractions. Subfraction four (5.48 mg), which eluted at 14.0 min, yielded wheldone (**1**). This process has been

repeated several times to isolate larger quantities of **1**, showing the reproducibility of co-culturing *A. fischeri* and *X. flabelliformis*.

### Preparation of the (R)- and (S)-MTPA Ester Derivatives of wheldone

To 0.25 mg of compound **1** were added 450  $\mu\text{L}$  of pyridine-*d*5, and the solution was transferred into an NMR tube. To initiate the reaction, 20  $\mu\text{L}$  of (*R*)-(-)-  $\alpha$ -methoxy- $\alpha$ -(trifluoromethyl)phenylacetyl (MTPA) chloride were added with careful shaking and then monitored immediately by  $^1\text{H}$  NMR at the following time points: 0, 5, 10, and 15 min. The reaction was found to be complete in 5 min, yielding the mono (*S*)-MTPA ester derivative (**1a**).  $^1\text{H}$  NMR data of **1a** (500 MHz, pyridine-*d*5):  $\delta\text{H}$  1.55 (3H, H<sub>3</sub>-22), 1.88 (3H, H<sub>3</sub>-25). In an analogous manner, 0.25 mg of compound **1** dissolved in 400  $\mu\text{L}$  pyridine-*d*5 was reacted in a second NMR tube with 20  $\mu\text{L}$  of *S*-(+)- $\alpha$ -methoxy- $\alpha$ -(trifluoromethyl)phenylacetyl (MTPA) chloride for the same time points, to afford the mono (*R*)-MTPA ester derivative (**1b**).  $^1\text{H}$  NMR data of **1b** (500 MHz, pyridine-*d*5):  $\delta\text{H}$  1.61 (3H, H<sub>3</sub>-22), 1.76 (3H, H<sub>3</sub>-25).

*wheldone* (**1**). White, amorphous powder;  $[\alpha]_{\text{D}}^{20} = +182$  (c 0.10, MeOH); UV (MeOH)  $\lambda_{\text{max}}$  (log  $\epsilon$ ) 262 (3.74), 217 (3.70) nm;  $^1\text{H}$  NMR (CD<sub>3</sub>OD, 700 MHz) and  $^{13}\text{C}$  (CD<sub>3</sub>OD, 175 MHz) (See Table 1); HRESIMS  $m/z$  431.2423 [M+H]<sup>+</sup> (calcd. For C<sub>25</sub>H<sub>35</sub>O<sub>6</sub>, 431.2433).

### Cytotoxicity Assay

Human melanoma cancer cells MDA-MB-435, human breast cancer cells MDA-MB-231 and human ovarian cancer cells OVCAR3 were purchased from the American Type Culture Collection (Manassas, VA). The cell line was propagated at 37°C in 5% CO<sub>2</sub> in RPMI 1640 medium, supplemented with fetal bovine serum (10%), penicillin (100 units/mL), and streptomycin (100  $\mu\text{g}/\text{mL}$ ). Cells in log phase growth were harvested by trypsinization followed by two washing to remove all traces of enzyme. A total of 5,000 cells were seeded per well of a 96-well clear, flat-bottom plate (Microtest 96<sup>®</sup>, Falcon) and incubated overnight (37°C in 5% CO<sub>2</sub>). Samples dissolved in DMSO were then diluted and added to the appropriate wells. The cells were incubated in the presence of test substance for 72 h at 37°C and evaluated for viability with a commercial absorbance assay (CellTiter-Blue Cell Viability Assay, Promega Corp, Madison, WI) that measured viable cells. IC<sub>50</sub> values are expressed in  $\mu\text{M}$  relative to the solvent (DMSO) control.

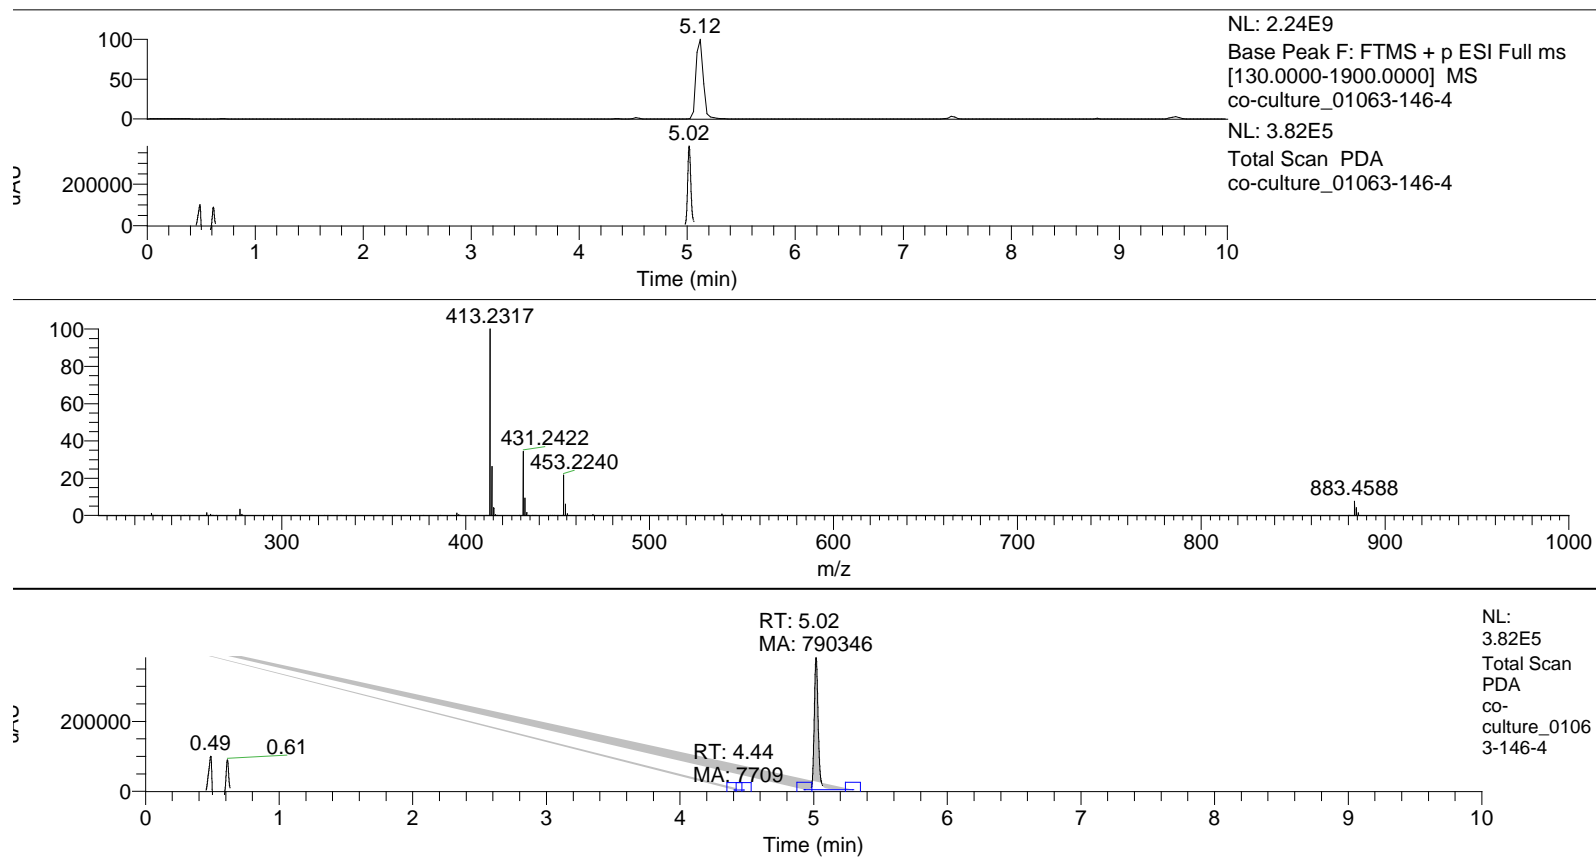

**Figure S1.** UPLC-MS chromatogram (base peak and PDA data; top), (+)-HRESIMS spectrum (middle), purity (bottom) of compound **1**.

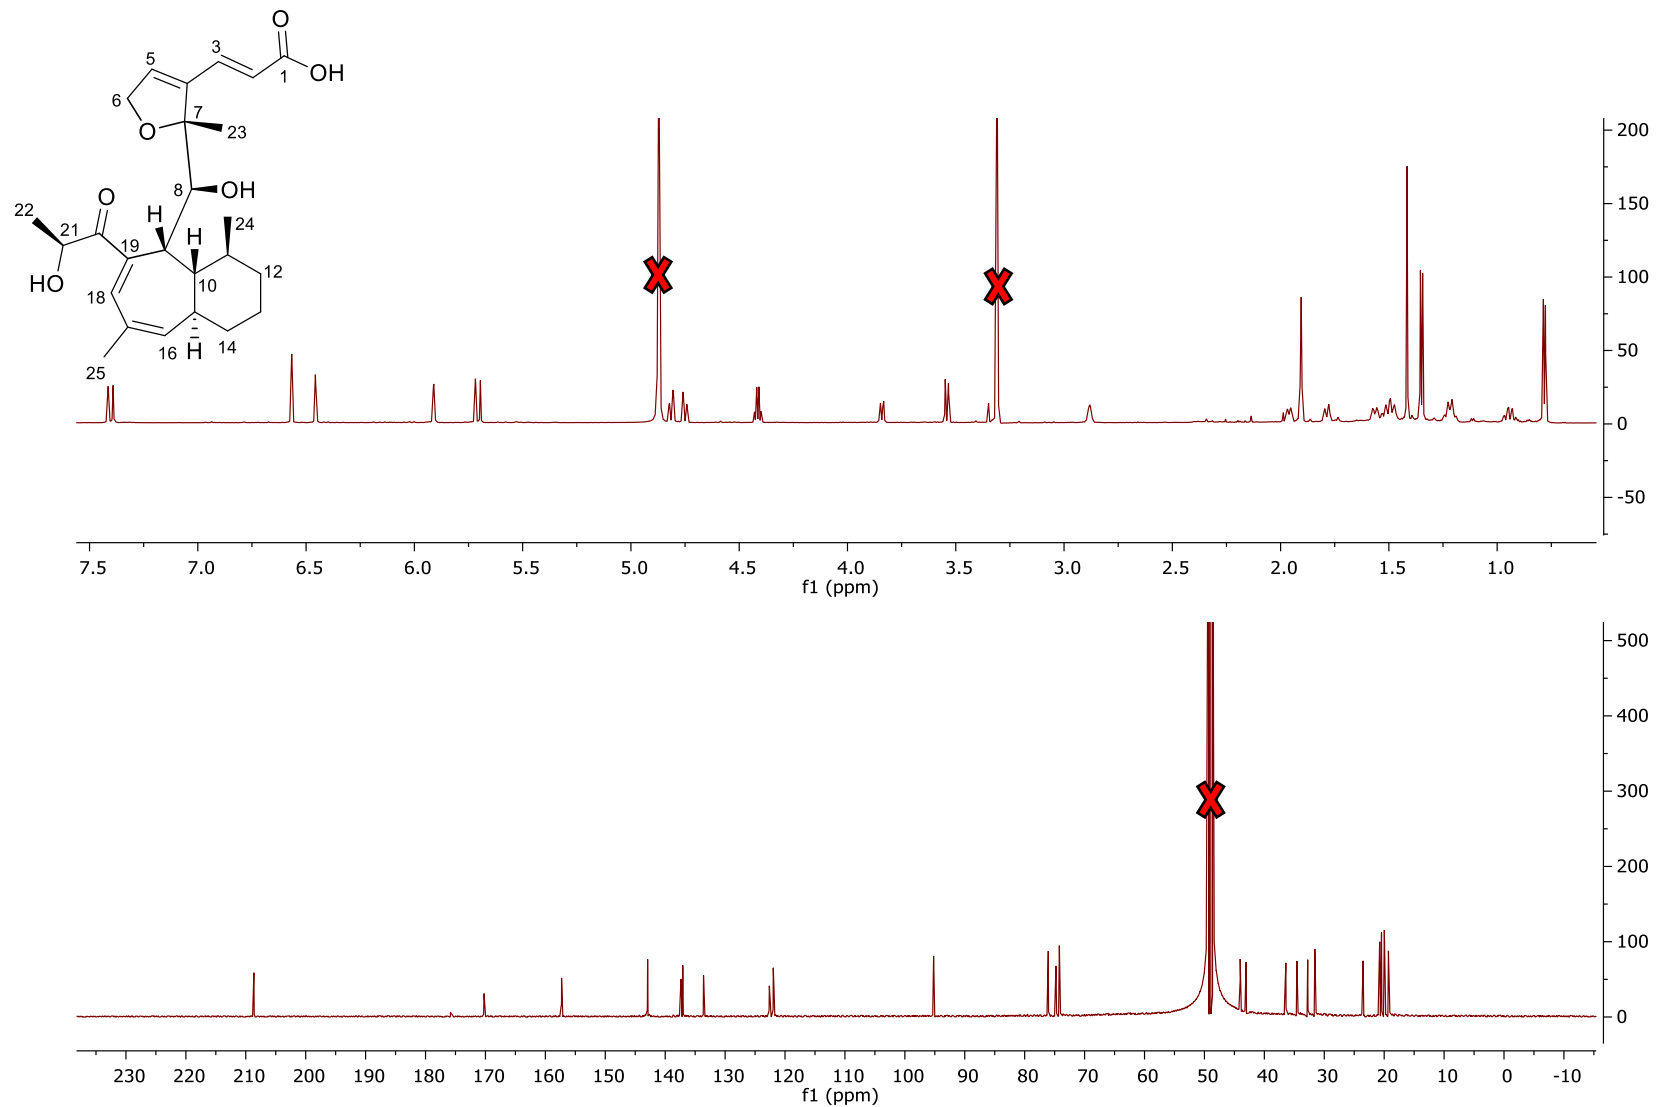

**Figure S2.**  $^1\text{H}$  (700 MHz) and  $^{13}\text{C}$  (175 MHz) NMR data for wheldone (**1**) in  $\text{CD}_3\text{OD}$ .

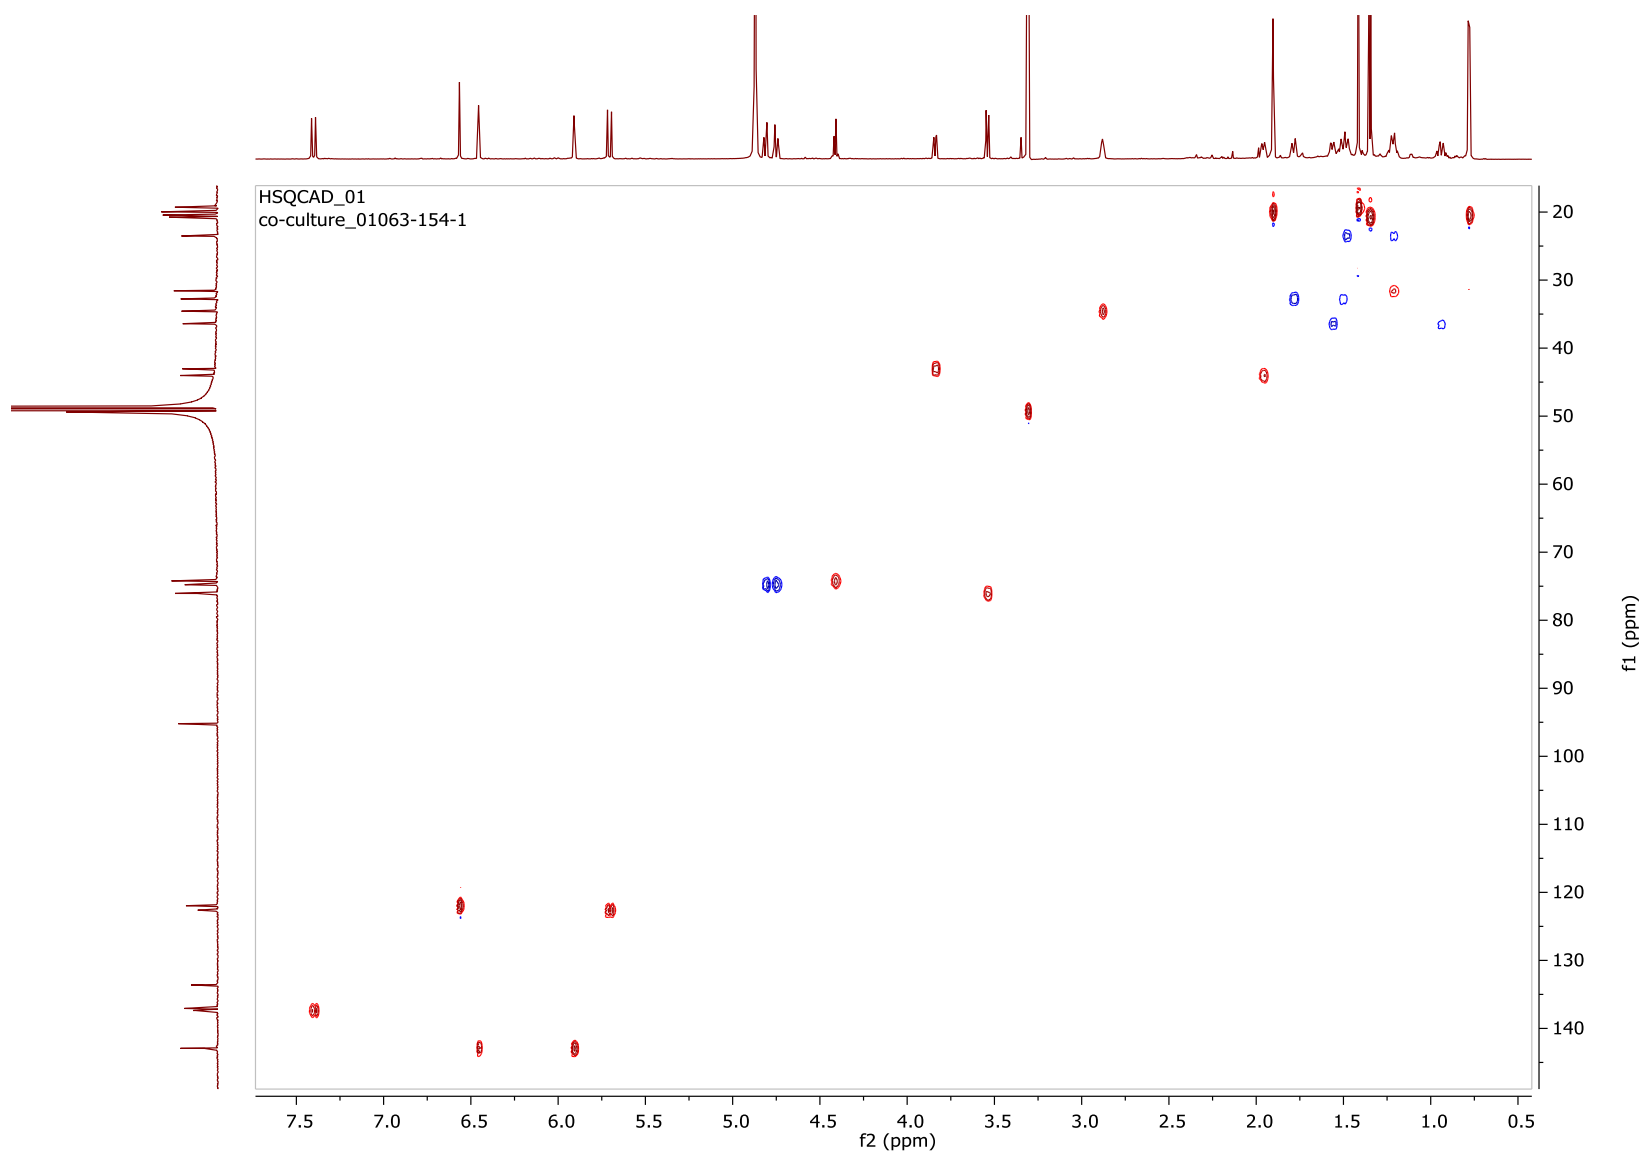

**Figure S3.** DEPT-edited HSQC NMR spectrum of compound **1** (700 MHz, CD<sub>3</sub>OD).

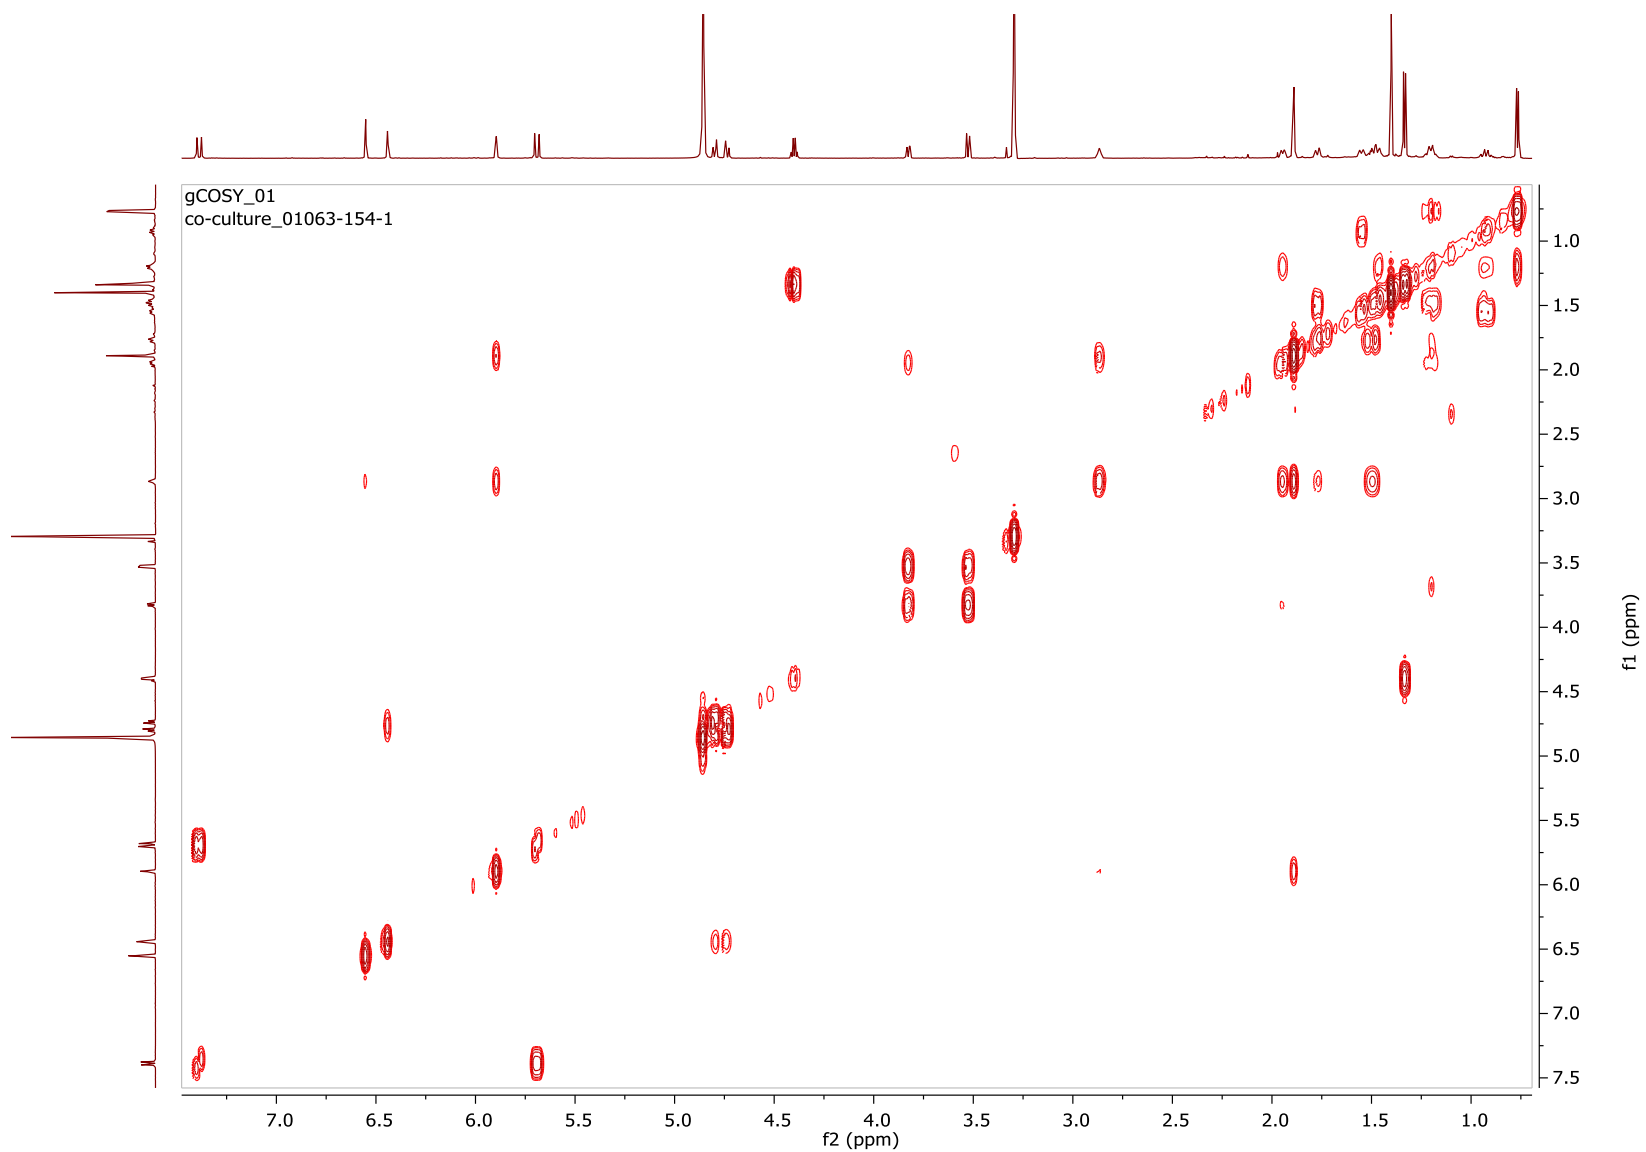

**Figure S4.** COSY NMR spectrum of compound **1** (700 MHz, CD<sub>3</sub>OD).



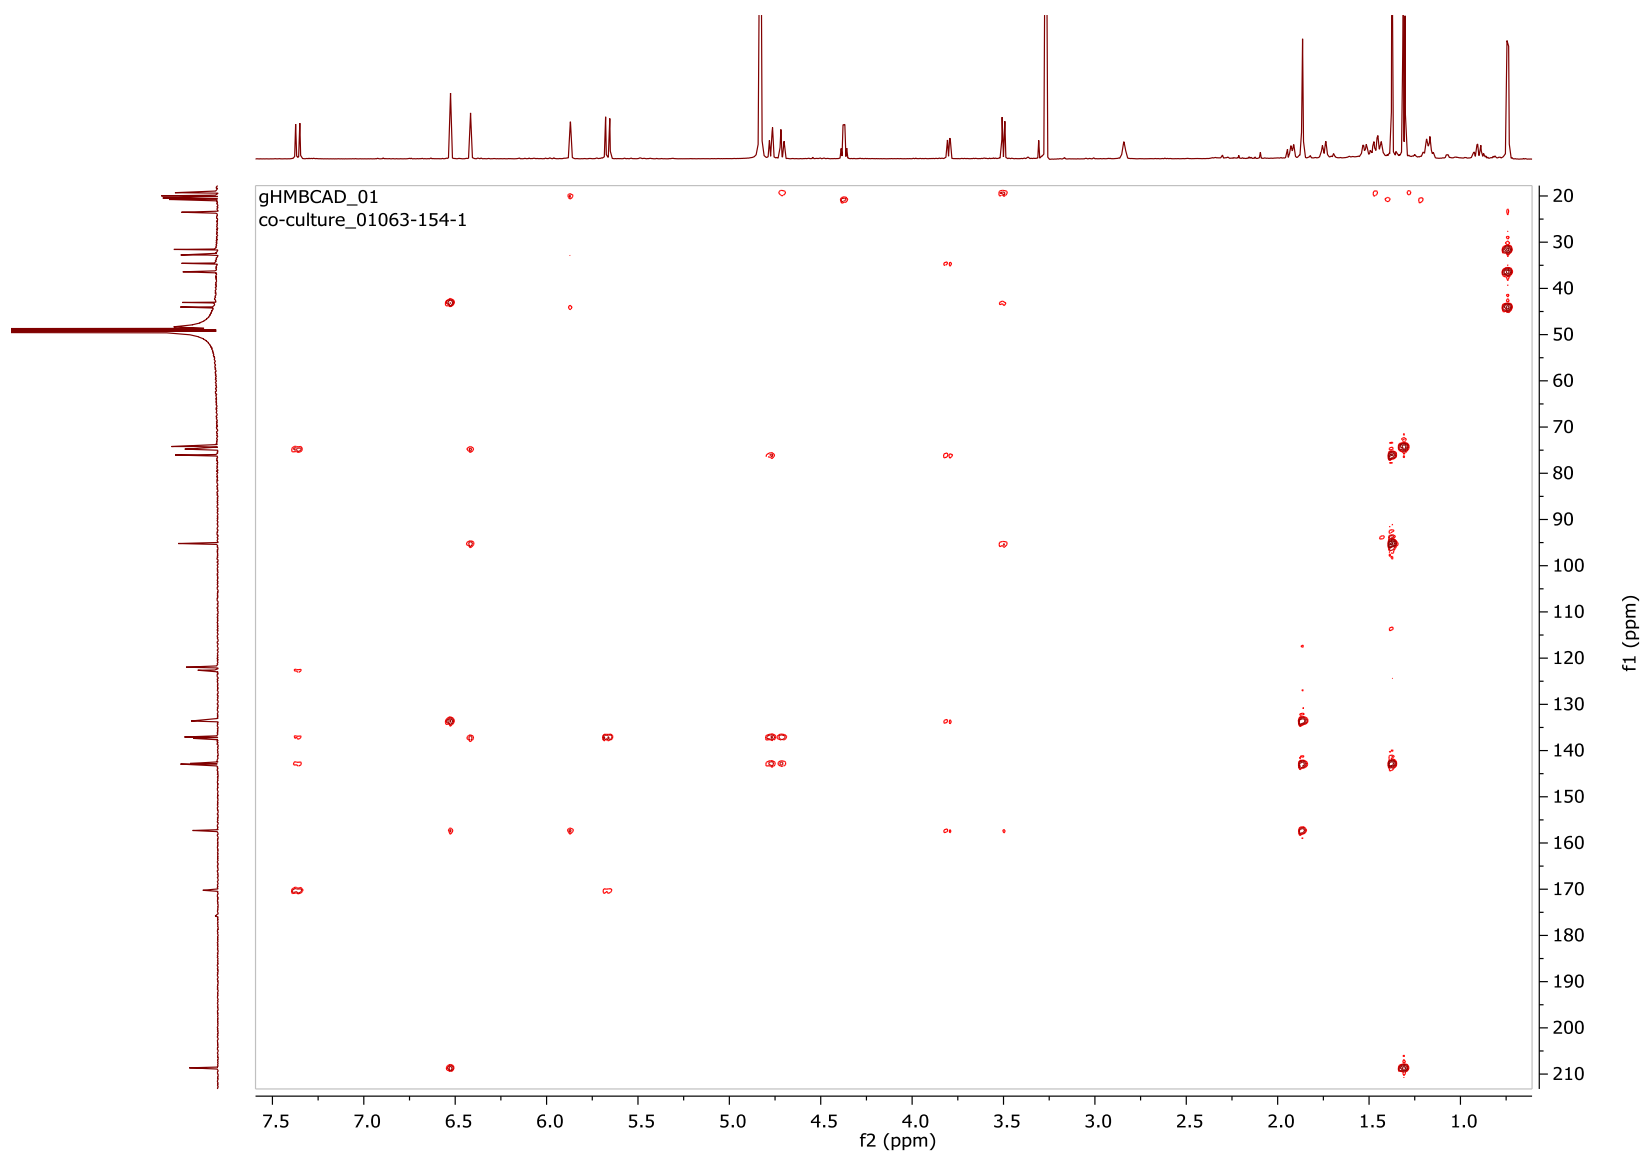

**Figure S5.** HMBC NMR spectrum of compound **1** (700 MHz, CD<sub>3</sub>OD).

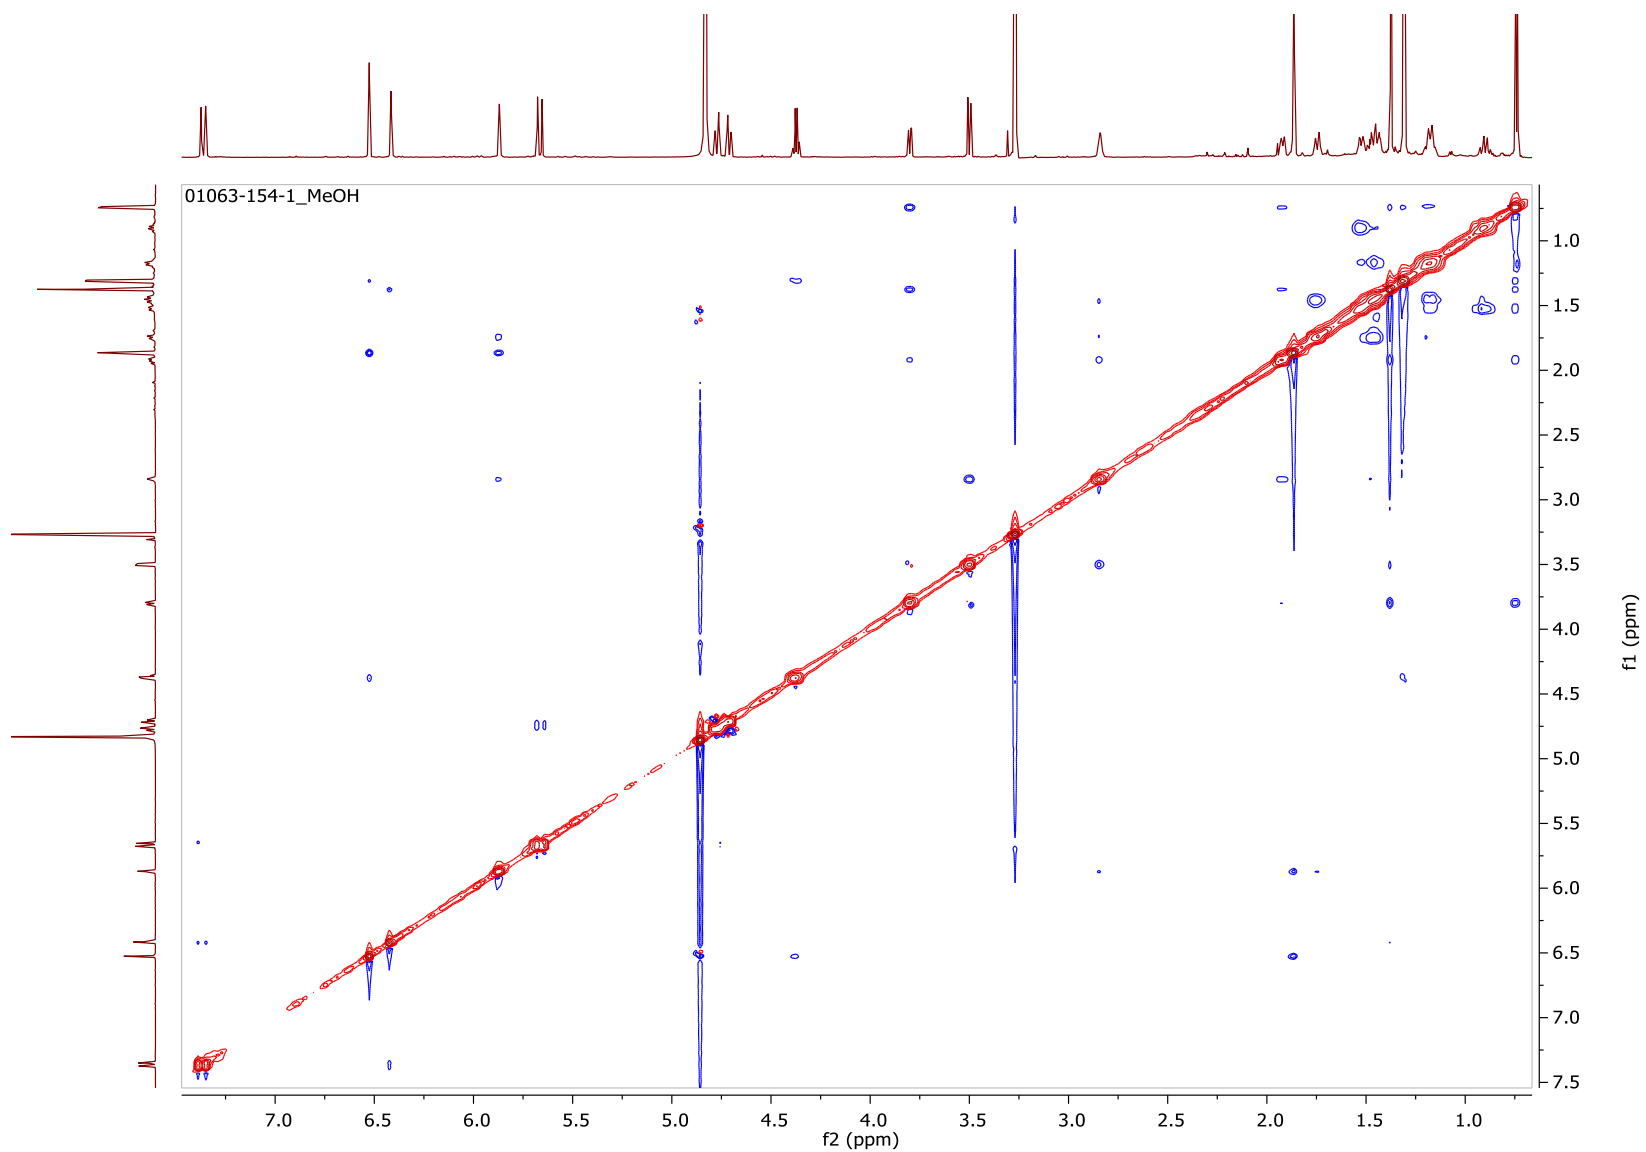

**Figure S6.** NOESY NMR spectrum of compound **1** (400 MHz, CD<sub>3</sub>OD).

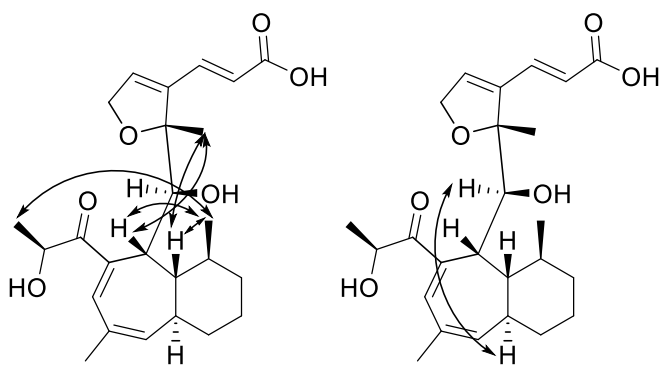

**Figure S7.** Key NOESY correlations for compound **1**. The structure is presented twice, so that it is easier to see the key correlations for each face of the molecule.

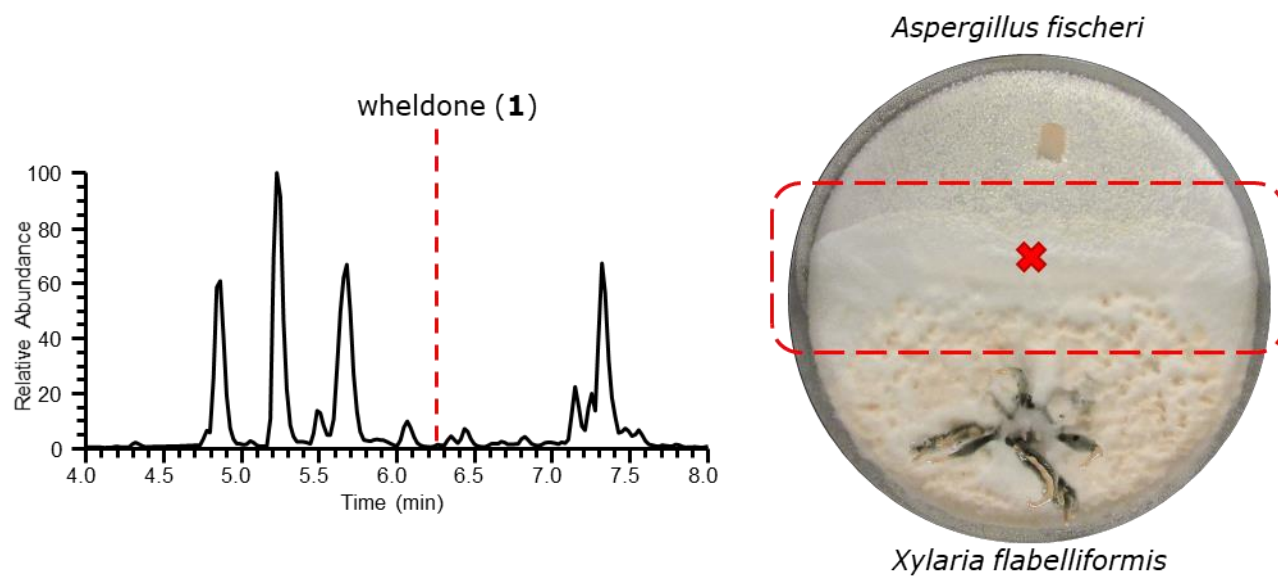

**Figure S8.** Wheldone (1) was first noted as a minor component in the base peak chromatogram during *in situ* analysis<sup>4</sup> of the junction that developed between *A. fischeri* and *X. flabelliformis* (shown in the box in the co-culture Petri dish at the right).

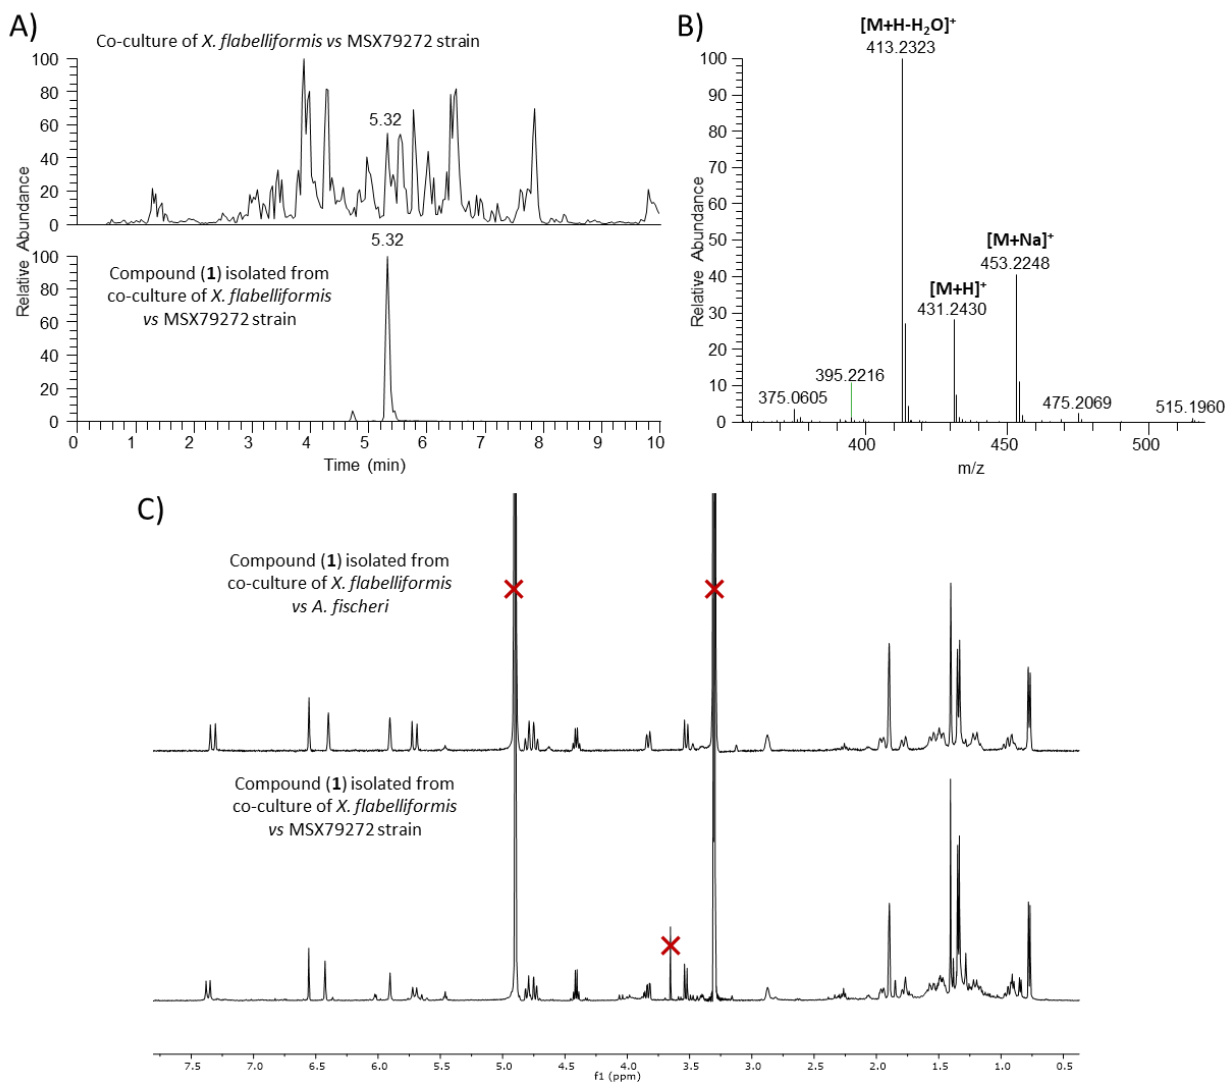

**Figure S9.** Data confirming the biosynthesis of **1** from a co-culture of *X. flabelliformis* vs. fungal strain MSX79272. A) UPLC-MS chromatogram (base peak of extract; top and **1**; bottom) for the co-culture of *X. flabelliformis* vs strain MSX79272. B) Mass spectrum data of **1** isolated from *X. flabelliformis* vs. MSX79272. C)  $^1H$  NMR data comparison between **1** isolated from the two separate co-culture experiments.

- (1) Mead, M. E.; Knowles, S. L.; Raja, H. A.; Beattie, S. R.; Kowalski, C. H.; Steenwyk, J. L.; Silva, L. P.; Chiaratto, J.; Ries, L. N.; Goldman, G. H.; Oberlies, N. H.; Rokas, A. Characterizing the pathogenic, genomic, and chemical traits of *Aspergillus fischeri*, a close relative of the major human fungal pathogen *Aspergillus fumigatus*. *mSphere* **2019**, *4*, e00018-19.
- (2) Sica, V. P.; Rees, E. R.; Tchegnon, E.; Bardsley, R. H.; Raja, H. A.; Oberlies, N. H. Spatial and temporal profiling of griseofulvin production in *Xylaria cubensis* using mass spectrometry mapping. *Front. Microbiol.* **2016**, *7*, 544.
- (3) Mead, M. E.; Raja, H. A.; Steenwyk, J. L.; Knowles, S. L.; Oberlies, N. H.; Rokas, A. Draft Genome Sequence of the Griseofulvin-Producing Fungus *Xylaria flabelliformis* Strain G536. *Microbiol. Resour. Announc.* **2019**, *8*, e00890-19.
- (4) Knowles, S. L.; Raja, H. A.; Wright, A. J.; Lee, A. M. L.; Caesar, L. K.; Cech, N. B.; Mead, M. E.; Steenwyk, J. L.; Ries, L.; Goldman, G. H.; Rokas, A.; Oberlies, N. H. Mapping the Fungal Battlefield: Using in situ Chemistry and Deletion Mutants to Monitor Interspecific Chemical Interactions Between Fungi. *Front. Microbiol.* **2019**, *10*, 285.
